# Supplementary material for: Investigating an Unknown Biodiversity: Evidence of Distinct Lineages of the Endemic Chola Guitarfish Pseudobatos percellens Walbaum, 1792 in the Western Atlantic Ocean
Source: MDPI journal article supplement (doi:10.3390/d15030344), 2023-02-28
Supplement: s1 [file s1]

## Supplementary material

### List of figures

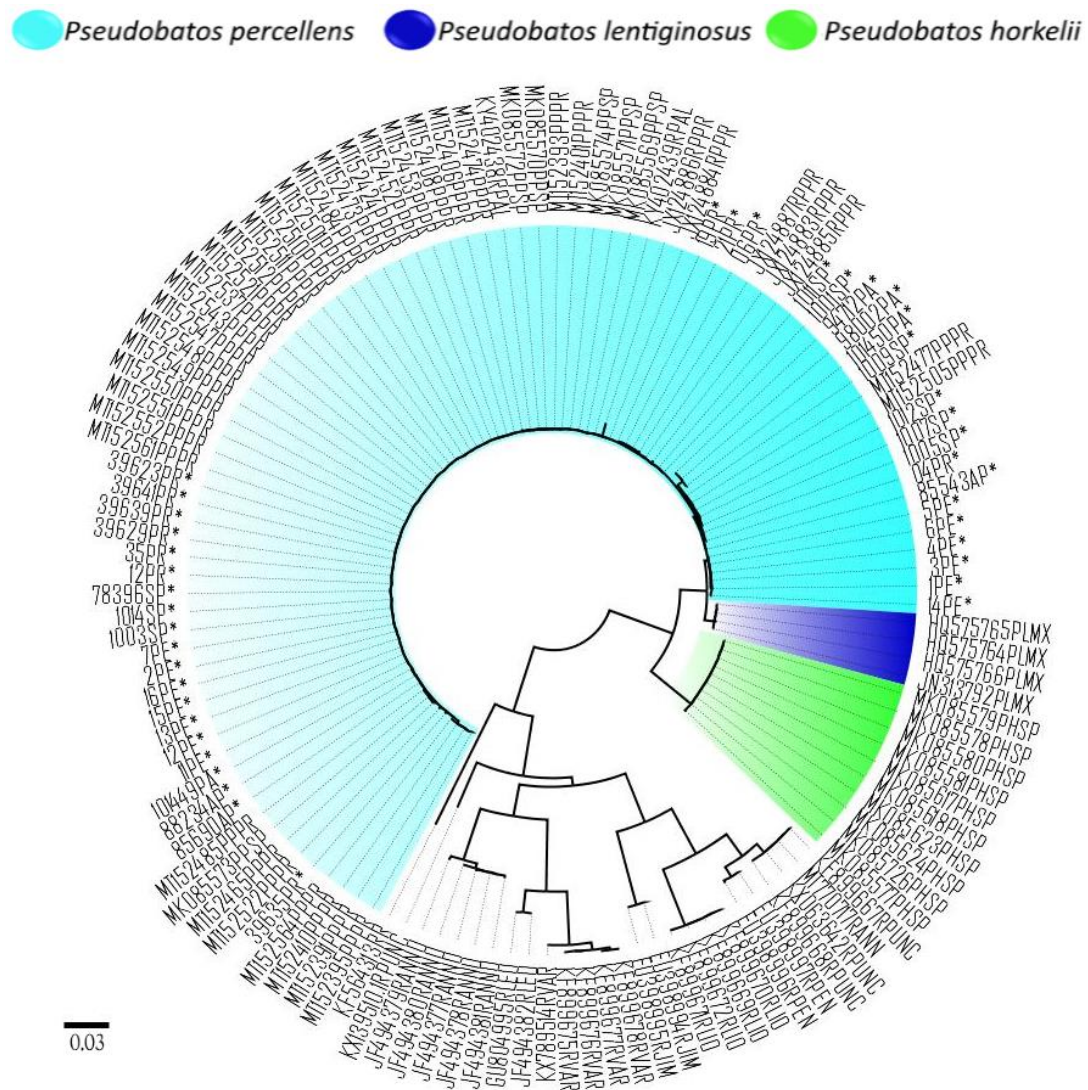

**Figure S1.** The Maximum Likelihood tree of the *Pseudobatos* and *Rhinobatos* specimens, based on the sequences of the mitochondrial cytochrome c oxidase subunit I gene under the K2P Model. The asterisks\* represent the 40 samples sequenced in this study.

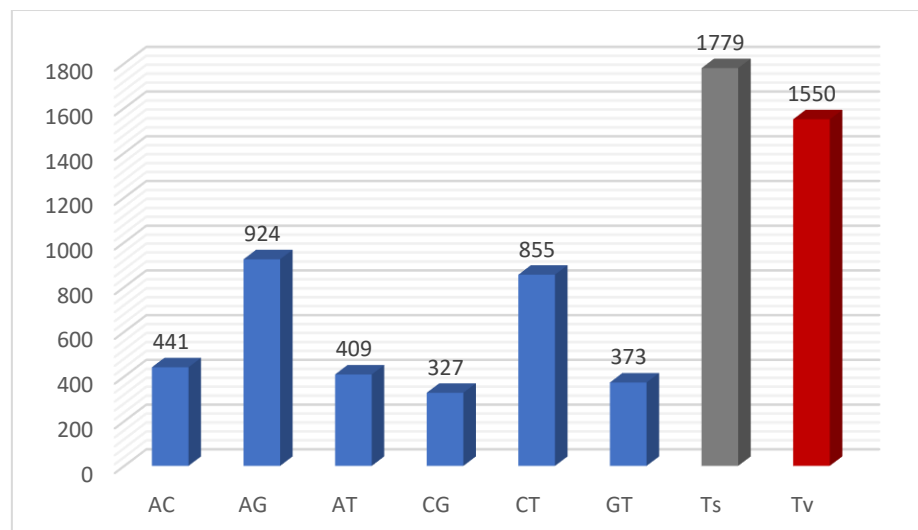

**Figure S2.** Identification of 3.329 SNPS (in blue), in transitions (in grey) and transversions (in red) characterized in *Pseudobatos percellens*.

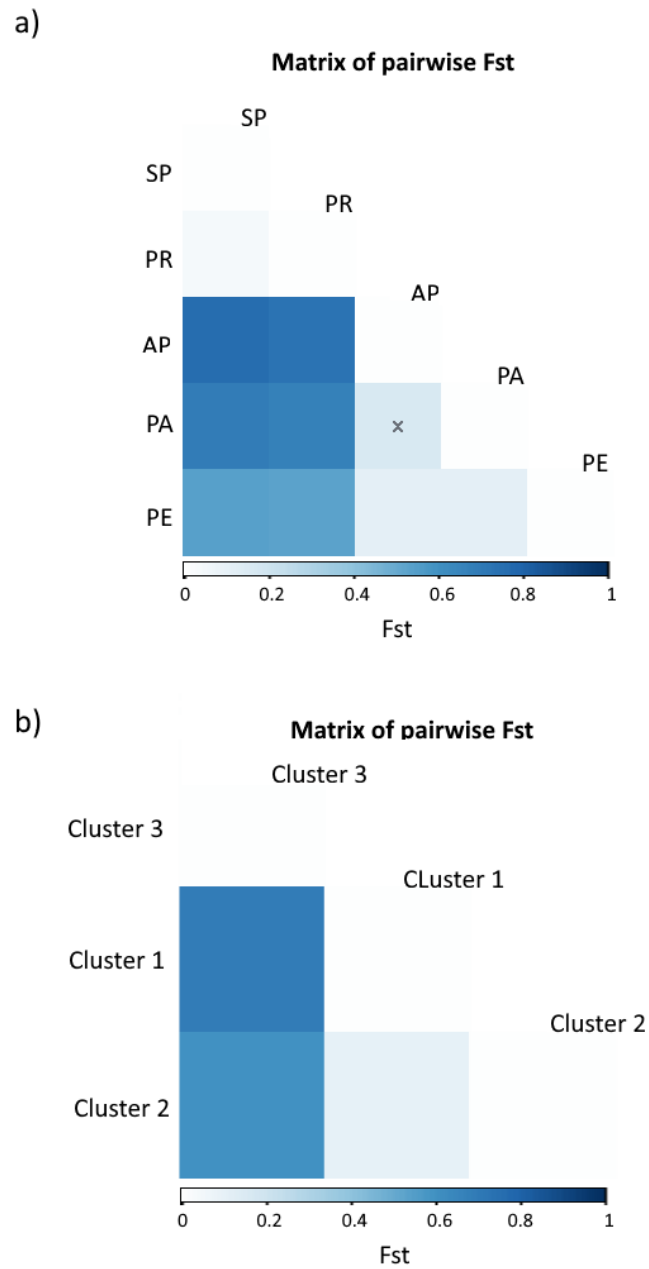

**Figure S3.** Heatmap depicting pairwise Fst Distance matrices using the dataset of 52 samples of *Pseudobatos percellens* with 3.329 SNPs, between geographical populations (a) and based on cluster (b). P-value not significant >0.05 represented by x. AP, Amapá; PA, Pará; PE, Pernambuco; SP, São Paulo; PR, Paraná.

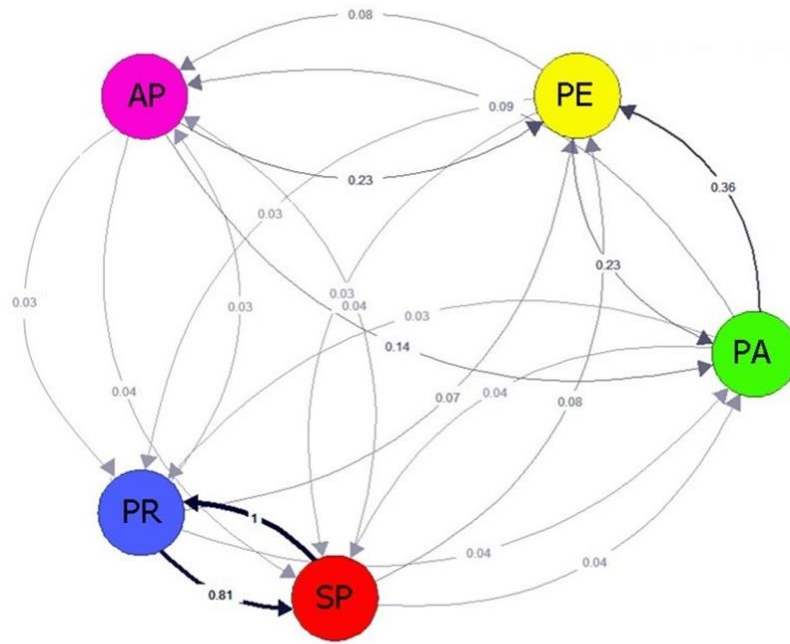

**Figure S4.** Contemporary gene flow based on number of migrant ( $N_m$ ), illustrating relationships based on geographic distribution of the *P. percellens* samples. The arrows indicate the direction of migration, while the stronger gene flows are represented by larger numbers, as well as the thicker and the darker colored lines. Fine and clear lines represent limited gene flow with a coefficient  $< 0.3$ . AP, Amapá; PA, Pará; PE, Pernambuco; SP, São Paulo; PR, Paraná.

## List of Tables

**Table S1.** Summary of 52 samples sequencing and processing of *Pseudobatos percellens*. Asterisks\* represent samples that were not sequenced in DNA barcode.

|    | Sample ID | Locality         |                 |              | DNA barcode | NGS Rawdate | Final data set |
|----|-----------|------------------|-----------------|--------------|-------------|-------------|----------------|
|    |           | City             | State of Brazil | Coast region |             |             |                |
| 1  | 85543AP   | Almeriana        | Amapá           | North        | yes         | 1.592.634   | 1.240.322      |
| 2  | 85690AP   | Almeriana        | Amapá           | North        | yes         | 207.416     | 175.933        |
| 3  | 88234AP   | Almeriana        | Amapá           | North        | yes         | 1.762.517   | 1.341.711      |
| 4  | 94712PA   | Soure            | Pará            | North        | yes         | 1.834.347   | 1.503.568      |
| 5  | 94990PA   | Soure            | Pará            | North        | *           | 1.568.179   | 1.359.066      |
| 6  | 98002PA   | Soure            | Pará            | North        | yes         | 1.789.388   | 1.581.637      |
| 7  | 101449PA  | Soure            | Pará            | North        | yes         | 1.246.354   | 924.580        |
| 8  | 101450PA  | Soure            | Pará            | North        | yes         | 1.780.418   | 1.494.963      |
| 9  | 11PE      | Recife           | Pernambuco      | Northeastern | yes         | 1.939.233   | 1.394.922      |
| 10 | 12PE      | Recife           | Pernambuco      | Northeastern | yes         | 3.044.497   | 2.538.142      |
| 11 | 13PE      | Recife           | Pernambuco      | Northeastern | yes         | 1.780.229   | 1.628.563      |
| 12 | 14PE      | Recife           | Pernambuco      | Northeastern | yes         | 1.503.580   | 1.377.005      |
| 13 | 15PE      | Recife           | Pernambuco      | Northeastern | yes         | 1.664.632   | 1.580.071      |
| 14 | 16PE      | Recife           | Pernambuco      | Northeastern | yes         | 1.678.142   | 1.493.681      |
| 15 | 3PE       | Recife           | Pernambuco      | Northeastern | yes         | 1.728.967   | 1.499.587      |
| 16 | 6PE       | Recife           | Pernambuco      | Northeastern | yes         | 1.722.904   | 1.555.572      |
| 17 | 1PE       | Recife           | Pernambuco      | Northeastern | yes         | 1.421.034   | 1.105.420      |
| 18 | 2PE       | Recife           | Pernambuco      | Northeastern | yes         | 1.198.502   | 907.854        |
| 19 | 8PE       | Recife           | Pernambuco      | Northeastern | *           | 1.358.980   | 975.245        |
| 20 | 4PE       | Recife           | Pernambuco      | Northeastern | yes         | 1.324.023   | 982.652        |
| 21 | 5PE       | Recife           | Pernambuco      | Northeastern | yes         | 1.221.237   | 1.012.540      |
| 22 | 7PE       | Recife           | Pernambuco      | Northeastern | yes         | 1.667.441   | 1.394.922      |
| 23 | 1001SP    | Santos           | São Paulo       | Southeastern | yes         | 1.829.515   | 1.526.873      |
| 24 | 1002      | Santos           | São Paulo       | Southeastern | *           | 1.333.021   | 974.521        |
| 25 | 1003SP    | Santos           | São Paulo       | Southeastern | yes         | 1.362.623   | 1.098.248      |
| 26 | 1005      | Santos           | São Paulo       | Southeastern | yes         | 2.081.031   | 1.845.214      |
| 27 | 1006      | Santos           | São Paulo       | Southeastern | *           | 1.350.320   | 1.024.103      |
| 28 | 1007      | Santos           | São Paulo       | Southeastern | yes         | 1.299.510   | 992.452        |
| 29 | 1009SP    | Santos           | São Paulo       | Southeastern | yes         | 1.747.620   | 1.363.464      |
| 30 | 1010SP    | Santos           | São Paulo       | Southeastern | *           | 2.406.931   | 2.168.945      |
| 31 | 1011      | Santos           | São Paulo       | Southeastern | yes         | 1.458.652   | 1.203.547      |
| 32 | 1012SP    | Santos           | São Paulo       | Southeastern | yes         | 1.979.983   | 1.376.701      |
| 33 | 1014SP    | Santos           | São Paulo       | Southeastern | yes         | 1.875.725   | 1.055.045      |
| 34 | 1015SP    | Santos           | São Paulo       | Southeastern | *           | 1.799.062   | 1.509.097      |
| 35 | 78396SP   | Santos           | São Paulo       | Southeastern | yes         | 1.692.726   | 1.418.166      |
| 36 | 78398SP   | Santos           | São Paulo       | Southeastern | *           | 1.933.800   | 1.518.304      |
| 37 | 78412SP   | Santos           | São Paulo       | Southeastern | *           | 1.632.519   | 1.432.462      |
| 38 | 39623PR   | Pontal do Paraná | Paraná          | Southeastern | yes         | 2.221.370   | 1.997.624      |

|    |         |                  |        |              |     |           |           |
|----|---------|------------------|--------|--------------|-----|-----------|-----------|
| 39 | 39629PR | Pontal do Paraná | Paraná | Southeastern | yes | 2.009.598 | 1.859.092 |
| 40 | 39635PR | Pontal do Paraná | Paraná | Southeastern | yes | 1.922.036 | 1.697.671 |
| 41 | 39636PR | Pontal do Paraná | Paraná | Southeastern | *   | 2.088.145 | 1.776.926 |
| 42 | 39639PR | Pontal do Paraná | Paraná | Southeastern | yes | 1.527.188 | 1.324.798 |
| 43 | 39641PR | Pontal do Paraná | Paraná | Southeastern | yes | 2.942.812 | 2.578.145 |
| 44 | 39648PR | Pontal do Paraná | Paraná | Southeastern | *   | 2.062.981 | 1.834.540 |
| 45 | 39642PR | Pontal do Paraná | Paraná | Southeastern | *   | 1.401.230 | 1.024.125 |
| 46 | 02PR    | Pontal do Paraná | Paraná | Southeastern | *   | 1.232.281 | 921.452   |
| 47 | 04PR    | Pontal do Paraná | Paraná | Southeastern | yes | 1.074.999 | 852.003   |
| 48 | 06PR    | Pontal do Paraná | Paraná | Southeastern | yes | 1.311.201 | 909.852   |
| 49 | 12PR    | Pontal do Paraná | Paraná | Southeastern | yes | 1.488.771 | 1.123.050 |
| 50 | 19PR    | Pontal do Paraná | Paraná | Southeastern | yes | 1.088.741 | 869.231   |
| 51 | 21PR    | Pontal do Paraná | Paraná | Southeastern | yes | 1.666.212 | 1.320.547 |
| 52 | 35PR    | Pontal do Paraná | Paraná | Southeastern | yes | 1.464.214 | 1.180.357 |

**Table S2.** Genetic distances (Kimura -2- Parameter - K2P) based on COI sequences among *Pseudobatos* and *Rhinabatos* species (below the diagonal) and standard errors (above the diagonal). The numbers in bold represent the intraspecific K2P genetic distances.

|                                   | 1            | 2            | 3            | 4     | 5            | 6            | 7            | 8            | 9            | 10           | 11           | 12    |
|-----------------------------------|--------------|--------------|--------------|-------|--------------|--------------|--------------|--------------|--------------|--------------|--------------|-------|
| 1 <i>Pseudobatos percellens</i>   | <b>0.000</b> | 0.005        | 0.010        | 0.019 | 0.020        | 0.019        | 0.018        | 0.019        | 0.020        | 0.019        | 0.019        | 0.019 |
| 2 <i>Pseudobatos lentiginosus</i> | 0.013        | <b>0.000</b> | 0.010        | 0.019 | 0.020        | 0.019        | 0.018        | 0.019        | 0.020        | 0.019        | 0.019        | 0.020 |
| 3 <i>Pseudobatos horkelii</i>     | 0.057        | 0.057        | <b>0.000</b> | 0.022 | 0.020        | 0.019        | 0.018        | 0.019        | 0.020        | 0.020        | 0.019        | 0.019 |
| 4 <i>Rhinabatos rhinobatus</i>    | 0.178        | 0.176        | 0.214        | -     | 0.019        | 0.019        | 0.018        | 0.018        | 0.019        | 0.019        | 0.020        | 0.019 |
| 5 <i>Rhinabatos penggali</i>      | 0.188        | 0.195        | 0.189        | 0.176 | <b>0.000</b> | 0.015        | 0.006        | 0.017        | 0.015        | 0.016        | 0.010        | 0.005 |
| 6 <i>Rhinabatos jimbaranensis</i> | 0.163        | 0.171        | 0.174        | 0.168 | 0.110        | <b>0.000</b> | 0.013        | 0.018        | 0.017        | 0.017        | 0.015        | 0.014 |
| 7 <i>Rhinabatos punctifer</i>     | 0.180        | 0.185        | 0.185        | 0.171 | 0.039        | 0.111        | <b>0.005</b> | 0.015        | 0.013        | 0.014        | 0.010        | 0.003 |
| 8 <i>Rhinabatos variegatus</i>    | 0.181        | 0.183        | 0.196        | 0.166 | 0.157        | 0.161        | 0.143        | <b>0.000</b> | 0.010        | 0.015        | 0.018        | 0.016 |
| 9 <i>Rhinabatos leucospilus</i>   | 0.188        | 0.190        | 0.188        | 0.161 | 0.126        | 0.138        | 0.115        | 0.055        | <b>0.000</b> | 0.014        | 0.017        | 0.014 |
| 10 <i>Rhinabatos annulatus</i>    | 0.174        | 0.175        | 0.183        | 0.159 | 0.131        | 0.135        | 0.118        | 0.122        | 0.101        | <b>0.000</b> | 0.017        | 0.015 |
| 11 <i>Rhinabatos lionotus</i>     | 0.181        | 0.191        | 0.189        | 0.178 | 0.063        | 0.111        | 0.077        | 0.169        | 0.157        | 0.153        | <b>0.000</b> | 0.010 |
| 12 <i>Rhinabatos annandalei</i>   | 0.183        | 0.189        | 0.183        | 0.178 | 0.015        | 0.108        | 0.026        | 0.140        | 0.112        | 0.125        | 0.066        | -     |

**Table S3.** - Matrix of Pairwise  $F_{ST}$  (below diagonal) and  $p$ -values (above diagonal divide) among geographical states populations of *Pseudobatos percellens* based on 3.329 SNP data.

|            | Amapá        | Pará         | Pernambuco   | São Paulo    | Paraná |
|------------|--------------|--------------|--------------|--------------|--------|
| Amapá      | -            |              |              |              |        |
| Pará       | 0.160        | -            |              |              |        |
| Pernambuco | <b>0.118</b> | <b>0.112</b> | -            |              |        |
| São Paulo  | <b>0.764</b> | <b>0.696</b> | <b>0.544</b> | -            |        |
| Paraná     | <b>0.730</b> | <b>0.676</b> | <b>0.538</b> | <b>0.043</b> | -      |
